# Supplementary material for: Autophagy of OTUD5 destabilizes GPX4 to confer ferroptosis-dependent kidney injury
Source: PubMed Central journal article supplement (PMC10728081; doi:10.1038/s41467-023-44228-5), 2023-12-18

**Supplementary Information for**

**Autophagy of OTUD5 Destabilizes GPX4 to Confer Ferroptosis-  
Dependent Kidney Injury**

Likai Chu, *et al.*

\*Correspondance to: junliu@suda.edu.cn

**This PDF file includes:**

Supplementary Figs. 1 to 7,

Supplementary Tables 1 and 2

Uncropped immunoblots gels for Supplementary Figures 2, 3, 5, 6, and 7

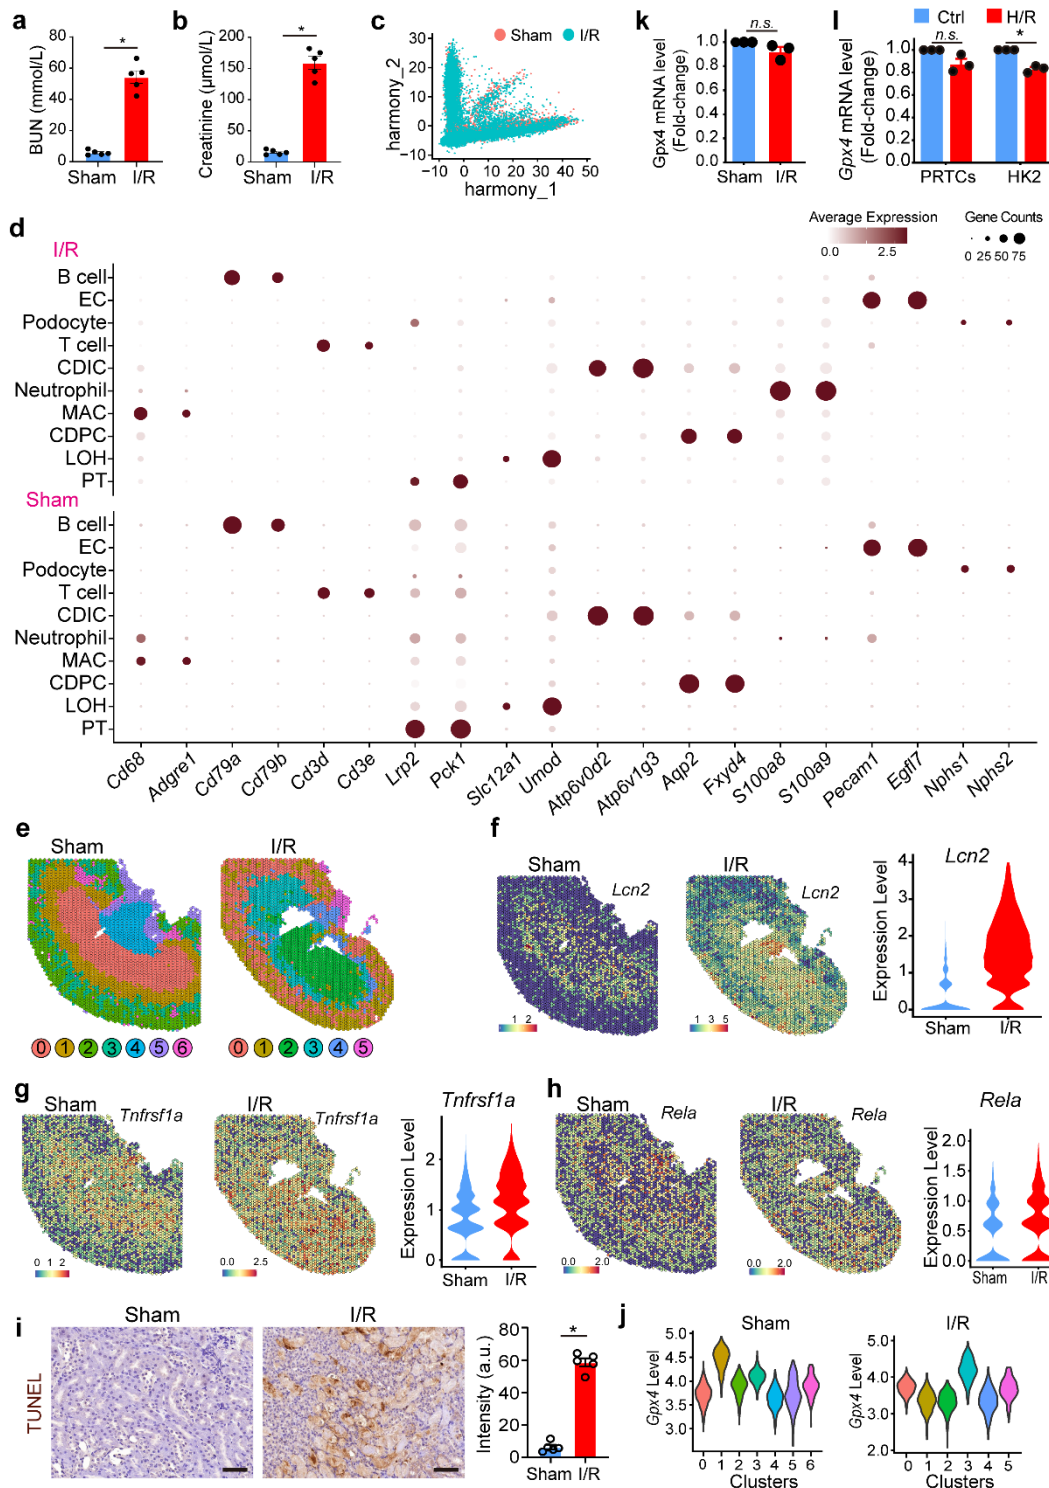

**Supplementary Fig. 1. scRNA sequencing and spatial transcriptomics reveal GPX4-mediated tubular cell ferroptosis in I/R-induced AKI.** **a, b** Serum BUN (**a**) and (**b**) creatinine levels of sham or I/R-treated mice. Data are presented as mean  $\pm$  s.e.m.; statistical significance was determined using an unpaired two-tailed Student's *t*-test, \**p* < 0.05. **c** The batch effect correction of the two samples. **d** The dot plot shows expressions of two representative marker genes of each cell type from scRNA data of Figure 1a. **e** Hematoxylin and eosin (H&E) staining of kidney sections and unbiased clustering of the spatial transcriptome (ST) spots of sham and I/R-treated kidneys. (**f-h**) Spatial feature plots and Violin plots of kidney injury marker gene *Lcn2* (**f**), *Tnfrsf1a* (**g**),

*Rela* (h) in ST spots of sham or I/R-treated kidneys. i IHC staining and quantification of TUNEL expression on kidney sections from sham or I/R-treated mice (n=5); scale bars, 50  $\mu$ m. j Violin plots of *Gpx4* expressions in clusters from sham or I/R-treated mouse kidneys. k, l mRNA level of GPX4 in mouse kidneys (n=5 per group), PRTC, and HK2 cells. Data are presented as mean  $\pm$  s.e.m.; statistical significance was determined using an unpaired two-tailed Student's *t*-test, \**p* < 0.05, n.s.: no significance.

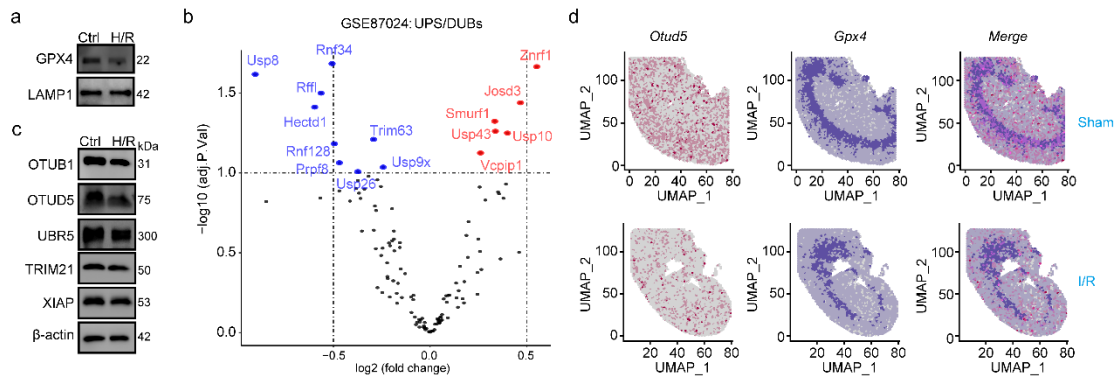

**Supplementary Fig. 2. OTUD5 is a GPX4 interacting protein for stabilization in response to I/R.** a Immunoblot analysis of GPX4 in the lysosome of cells treated with or without H/R. b The volcano plot shows the expression profile of UPS/DUBs-associated genes in the kidney before and after I/R induction (GSE87024), the most dysregulated UPS/DUBs genes were labeled in blue (downregulation) or red font (upregulation). c Immunoblot analysis of the indicated proteins in cells treated with or without H/R. d Feature plot of *Otud5* and *Gpx4* expression, and their colocalization in ST spots of the two groups.

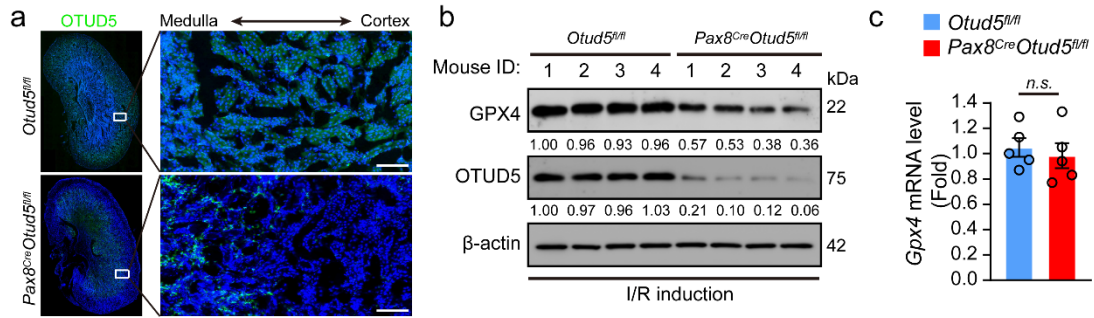

**Supplementary Fig. 3. *Otud5* deletion confers kidneys vulnerable to I/R.**

**a** Immunofluorescence analysis of OTUD5 expression in kidney samples from *Pax8<sup>Cre</sup>Otud5<sup>fl/fl</sup>* mice and their WT littermates (*Otud5<sup>fl/fl</sup>*). **b** 4 to 6-week-old *Pax8<sup>Cre</sup>Otud5<sup>fl/fl</sup>* ( $n = 4$ ) and their WT littermates ( $n = 4$ ) were subjected to kidney I/R surgery. After 48 hours, kidneys were collected and subjected to immunoblot analysis for OTUD5 and GPX4. **c** The mRNA level of *Gpx4* in *Pax8<sup>Cre</sup>Otud5<sup>fl/fl</sup>* mice and their WT littermates. All values are presented as mean  $\pm$  s.e.m.;  $p$  values were calculated by unpaired two-tailed student's  $t$ -test, \* $p < 0.05$ .

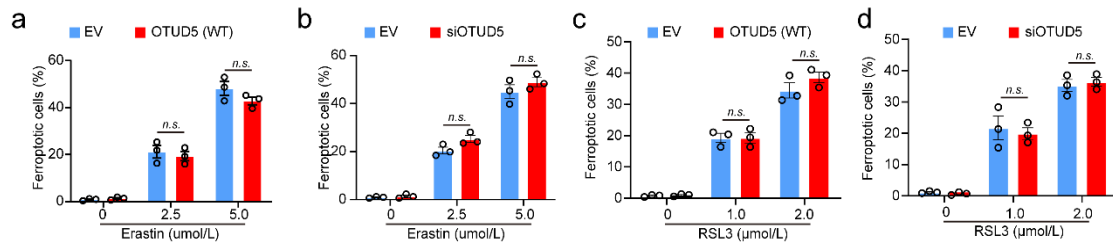

**Supplementary Fig. 4. OTUD5's minimal effect on erastin and RSL3-induced ferroptosis in renal tubular cells.** **a** Cell ferroptosis was measured in EV or WT OTUD5-transfected cells in the presence or absence of Erastin with the indicated doses for 24 hours. **b** Cell ferroptosis was measured in siCtrl or siOTUD5-transfected cells in the presence or absence of Erastin with the indicated doses for 24 hours. **c** Cell ferroptosis was measured in EV or WT OTUD5-transfected cells in the presence or absence of RSL3 with the indicated doses for 24 hours. **d** Cell ferroptosis was measured in siCtrl or siOTUD5-transfected cells in the presence or absence of RSL3 with the indicated doses for 24 hours. Data are from three repeated experiments, presented as mean  $\pm$  s.e.m.; statistical significance between groups as indicated was determined using an unpaired two-tailed Student's *t*-test, *n.s.*: no significance, *\*p* < 0.05.

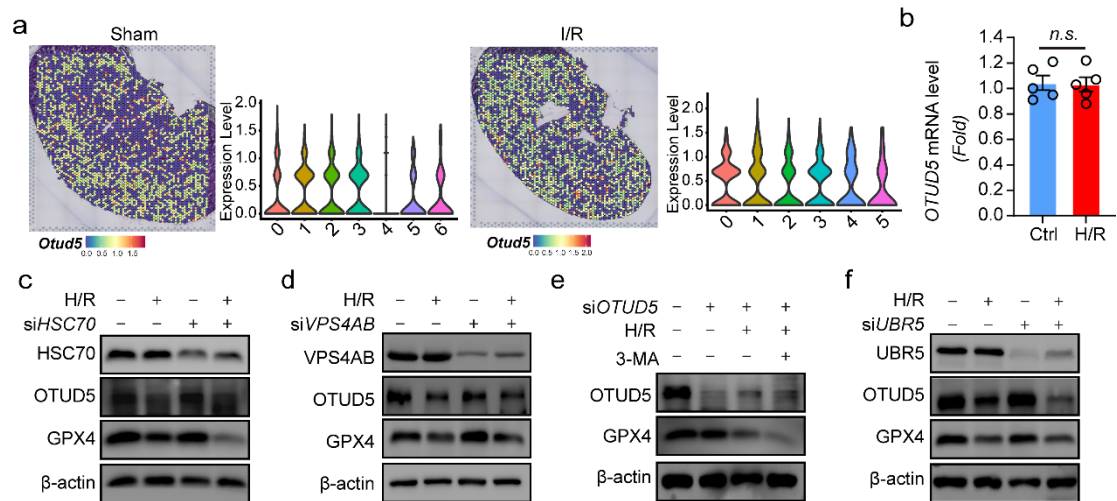

**Supplementary Fig. 5. Hypoxia activates autophagy degradation on OTUD5.** **a** Spatial expression pattern of *Otud5* in ST spots and clusters of sham or I/R-treated mice. **b** The expression level of *Otud5* was analyzed in PRTCs treated with or without H/R. **c-f** HK2 cells were transfected with siControl or siHSC70 (**c**), siVPS4AB (**d**) for 48 hours and treated with H/R condition. (**e**) OTUD5-depleted HK2 cells were treated with H/R conditions in the presence or absence of 3-MA. (**f**) HK2 cells were transfected with siControl or siUBR5 for 48 hours and treated with H/R condition.

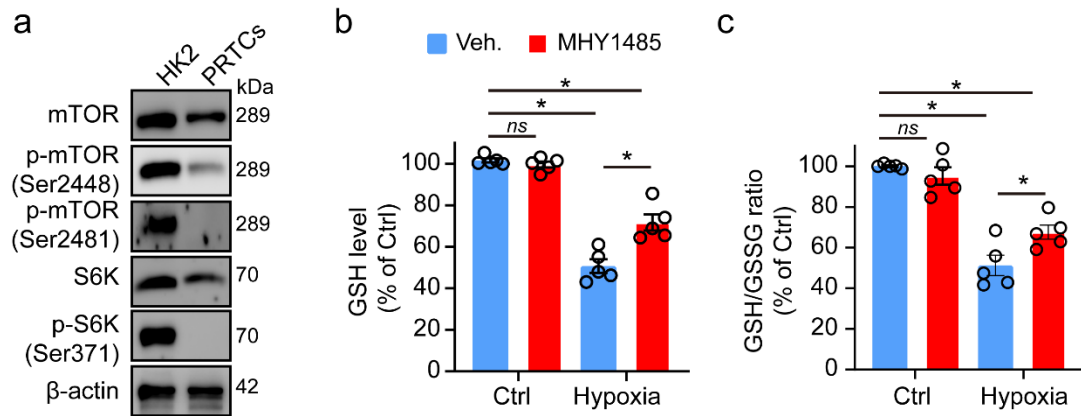

**Supplementary Fig. 6. H/R reduces OTUD5 through repressing mTORC1 signaling.**

**a** The protein lysate of HK2 and PRTCs were subjected to immunoblot and the levels of proteins associated with mTOR signaling were analyzed. **b, c** The GSH level (**b**) and GSH/GSSG ratios (**c**) in HK2 cells were determined before and after hypoxia induction. Data are presented as mean  $\pm$  s.e.m.; Statistical significance was determined using an unpaired two-tailed Student's *t*-test, \*  $p < 0.05$ , *n.s.*: no significance.

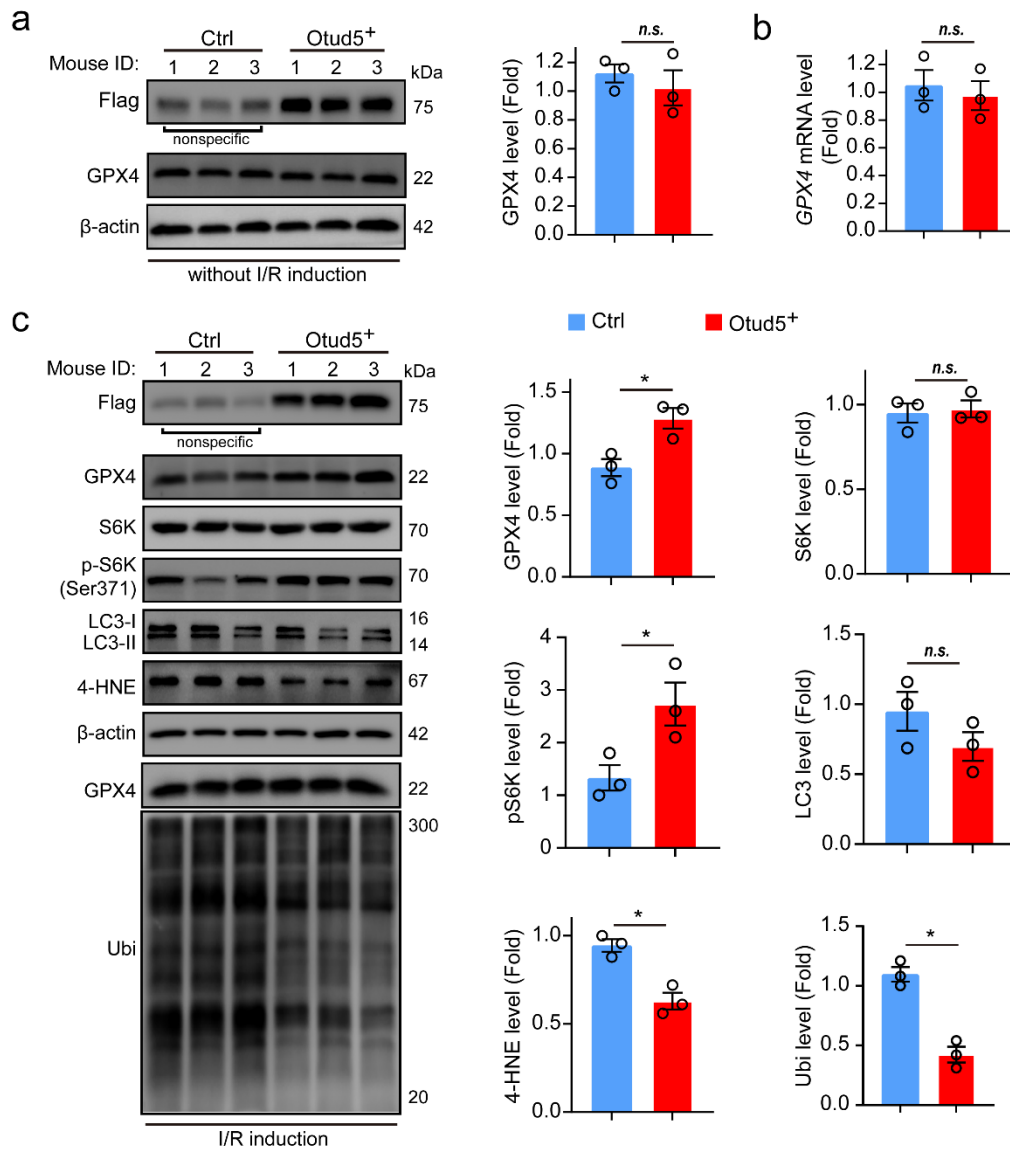

**Supplementary Fig. 7. AAV-mediated OTUD5 therapy protects renal function against I/R injury.** **a** 4 to 6-week-old C57BL/6J mice were intravenously injected with a single dose of  $3 \times 10^{11}$  copies of *Otud5*-contained virus. 48 hours after injection, mice were sacrificed and the kidneys were collected for immunoblot. The levels of GPX4 and Flag (OTUD5) were analyzed. **b** The mRNA level of *Gpx4* in the *Otud5*-expressed mice and the control mice ( $n=3$ ). **c** 4 to 6-week-old C57BL/6J mice were intravenously injected with a single dose of  $3 \times 10^{11}$  copies of *Otud5*-contained virus. 48 hours after injection, mice were subjected to I/R surgery and lived for another 48 hours. After that, mice were sacrificed and the kidneys were collected for immunoblot ( $n=3$ ). Data are presented as mean  $\pm$  s.e.m.; Statistical significance was determined using an unpaired two-tailed Student's *t*-test, *n.s.*: no significance.



**Supplementary Table 1. Reagents and antibodies were used in this study.**

| <b>Antibody</b>                           | <b>Supplier</b>              | <b>Catalog number</b> | <b>Clone number</b> |
|-------------------------------------------|------------------------------|-----------------------|---------------------|
| Anti-Glutathione Peroxidase 4             | Abcam                        | ab125066              | EPNCIR144           |
| Anti-Glutathione Peroxidase 4             | Abcam                        | ab41787               |                     |
| Anti-4 Hydroxynonenal                     | Abcam                        | ab48506               | HNEJ-2              |
| Anti-F4/80                                | Abcam                        | ab300421              | EPR26545-166        |
| Anti-OTUD5<br>Antibody                    | Polyclonal<br>Invitrogen     | PA5-20611             |                     |
| Anti-OTUD5<br>Antibody                    | Polyclonal<br>Proteintech    | 21002-1-AP            |                     |
| Anti-OTUD5 Rabbit mAb                     | Cell Signaling               | 20087S                | D8Y2U               |
| Anti-GPX4 Antibody                        | Cell Signaling               | 52455S                |                     |
| Anti-p70 S6 Kinase Antibody               | Cell Signaling               | 9202S                 |                     |
| Anti-Phospho-p70 S6 Kinase<br>(Ser371)    | Cell Signaling               | 9208S                 |                     |
| Anti-mTOR Rabbit mAb                      | Cell Signaling               | 2983S                 | 7C10                |
| Anti-Phospho-mTOR (Ser2481)               | Cell Signaling               | 2974S                 |                     |
| Anti-Phospho-mTOR (Ser2448)<br>Rabbit mAb | Cell Signaling               | 5536S                 | D9C2                |
| Anti-DYKDDDDK Tag Rabbit<br>mAb           | Cell Signaling               | 14793S                | D6W5B               |
| Anti-Ubiquitin Mouse mAb                  | Cell Signaling               | 3936S                 | P4D1                |
| Anti-Ubiquitin Rabbit mAb                 | Cell Signaling               | 20326S                | E6K4Y               |
| Anti-LC3A/B Antibody                      | Cell Signaling               | 4108S                 |                     |
| Anti-Becclin-1 Antibody                   | Cell Signaling               | 3738S                 |                     |
| Anti-Atg5 Rabbit mAb                      | Cell Signaling               | 9980S                 | D5G3                |
| Anti-Hamartin/TSC1                        | Cell Signaling               | 6935S                 | D43E2               |
| Anti-LAMP1 Rabbit mAb                     | Cell Signaling               | 9091S                 | D2D11               |
| Anti-OTUB1 Rabbit mAb                     | Cell Signaling               | 3783S                 | D8F7                |
| Anti-UBR5 Rabbit mAb                      | Cell Signaling               | 65344S                | D6O8Z               |
| Anti-XIAP Antibody                        | Cell Signaling               | 2042S                 |                     |
| Anti-TRIM21 Rabbit mAb                    | Cell Signaling               | 92043S                | D1O1D               |
| Anti-mouse IgG HRP-linked<br>Antibody     | Cell Signaling               | 7076S                 |                     |
| Anti-rabbit IgG HRP-linked<br>Antibody    | Cell Signaling               | 7074S                 |                     |
| Anti- $\beta$ -actin Rabbit mAb           | Cell Signaling               | 4970S                 | 13E5                |
| Anti-HSPA8/HSC70                          | Santa Cruz Biotechnology     | sc-7298               | sc-7298             |
| Anti-VSP4                                 | Santa Cruz Biotechnology     | sc-133122             | E-8                 |
| Anti-Glutathione Peroxidase 4             | Santa Cruz Biotechnology     | sc-166437             | D-3                 |
| Anti-KIM-1 (HAVCR1)                       | Boster Biological Technology | BA3536                |                     |
| Normal rabbit IgG                         | Santa Cruz Biotechnology     | sc-2027               |                     |
| Normal mouse IgG                          | Santa Cruz Biotechnology     | sc-2025               |                     |
| <b>Reagent</b>                            |                              |                       |                     |

|                        |                          |            |
|------------------------|--------------------------|------------|
| MG132                  | Selleck                  | S2619      |
| Bafilomycin A1         | Selleck                  | S1413      |
| RSL3                   | Selleck                  | S8155      |
| Cycloheximide          | Selleck                  | S7418      |
| Protein G Plus Agarose | Santa Cruz Biotechnology | sc-2002    |
| Lipofectamine 3000     | Invitrogen               | L3000015   |
| MHY1485                | Selleck                  | S7811      |
| 7-AAD                  | Invitrogen               | 00-6993-50 |
| BODIPY™ 581/591 C11    | Thermo Fisher Scientific | D3861      |
| CQ                     | Selleck                  | S6999      |
| <b>Plasmid</b>         |                          |            |
| Mouse_OTUD5            | Generalbiol              | N/A        |
| Human_His-OTUD5        | Generalbiol              | N/A        |
| Human_OTUD5 (C224S)    | Generalbiol              | N/A        |

**Supplementary Table 2. Information of primers used for quantitative real-time PCR analyses in this study.**

| Gene                 | Forward (5' to 3')       | Reverse (5' to 3')      |
|----------------------|--------------------------|-------------------------|
| Mouse_ <i>Gpx4</i>   | CCTCTGCTGCAAGAGCCTCCC    | CTTATCCAGGCAGACCATGTGC  |
| Human_ <i>GPX4</i>   | ACAAGAACGGCTGCGTGGTGAA   | GCCACACACTTGTGGAGCTAGA  |
| Mouse_ <i>Otud5</i>  | G TTCATGACATTCGGCTT      | CACAAGCAAAAAGTACCCTA    |
| Mouse_ <i>Lcn2</i>   | TCAAGGACGACAACATCATCTTCT | CTCCAGATGCTCCTTGGTATGG  |
| Mouse_ <i>Havcr1</i> | TACCTCCACTCCTCCAACATCTA  | TGCCAACATAGAAGCCCTTAGTA |
| Mouse_ <i>Il6</i>    | CCAGAAACCGCTATGAAGTTCCT  | TGTGTAATTAGCCTCCGACTTGT |
| Mouse_ <i>Tnf</i>    | GACCCTCACACTCAGATCATCTT  | CCTTGAAGAGAACCTGGGAGTAG |
| Mouse_ <i>GAPDH</i>  | CATCACTGCCACCCAGAAGACTG  | ATGCCAGTGAGCTTCCCGTTCAG |
| Human_ <i>GAPDH</i>  | ACCCACTCCTCCACCTTTGA     | CTGTTGCTGAGCCAAATTCGT   |

## Uncropped immunoblot gels for Supplementary Figure 2

Figure S2A-GPX4

Antibody information: Abcam, ab41787, 1:1000

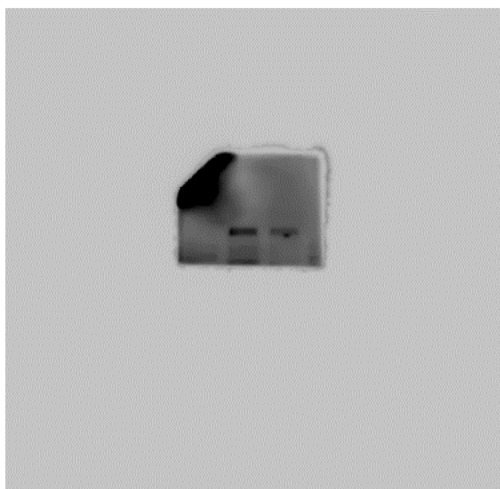

Figure S2C- $\beta$ -actin

Antibody information: Cell Signaling, 4970S, 1:1000

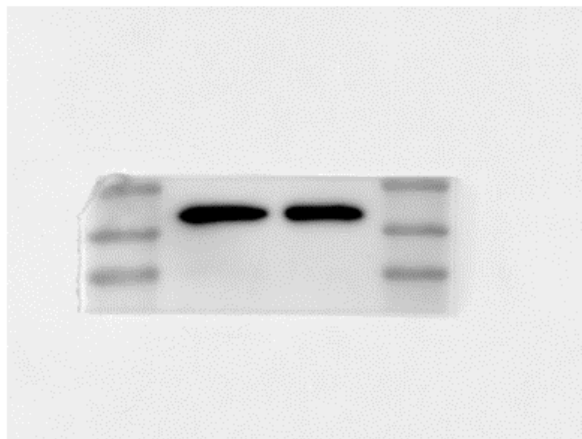

Figure S2A-LAMP1

Antibody information: Cell signaling, 9091S, 1:1000

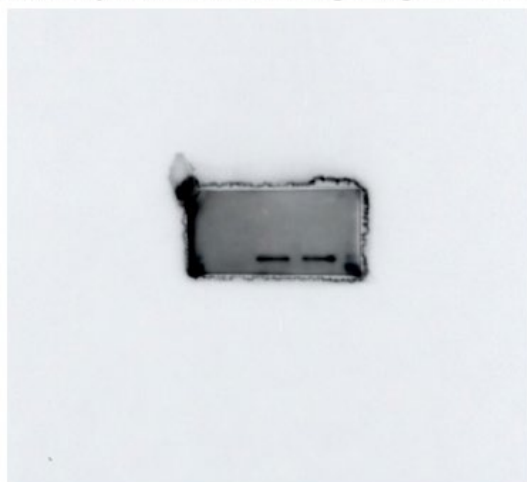

Figure S2C-OTUB1

Antibody information: Cell signaling, 3783S, 1:1000

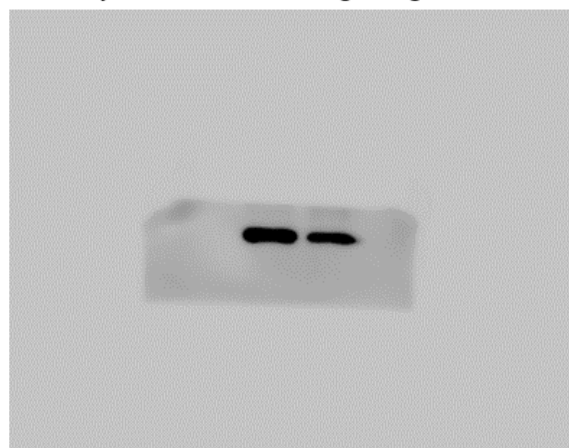

Figure S2C-UBR5

Antibody information: Cell signaling, 65344S, 1:500

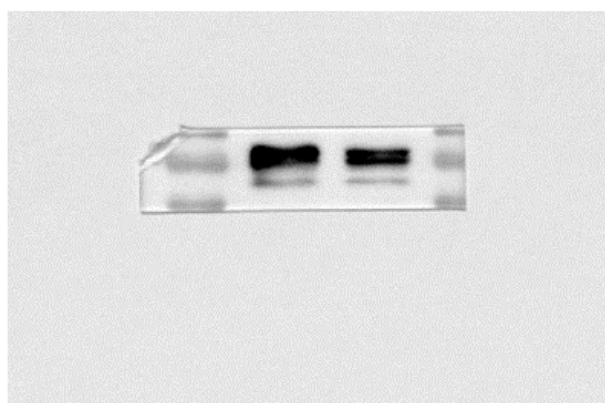

Figure S2C-XIAP

Antibody information: Cell signaling, 2042S, 1:1000

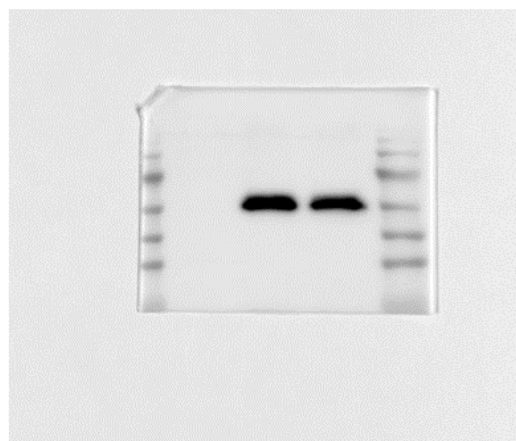

### Uncropped immunoblot gels for Supplementary Figure 3

Figure S3B-Actin

Antibody information: Cell Signaling, 4970S, 1:1000

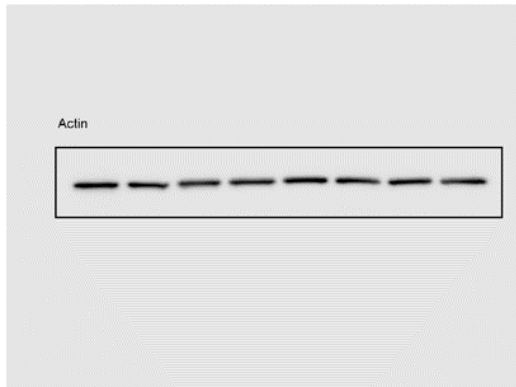

Figure S3B-GPX4

Antibody information: Abcam, ab41787, 1:1000

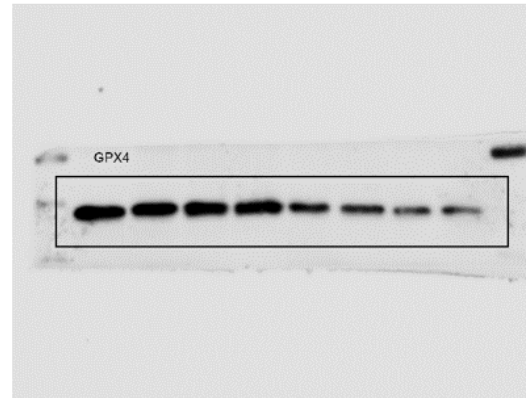

Figure S3B-OTUD5

Antibody information: Cell signaling, 20087S, 1:1000

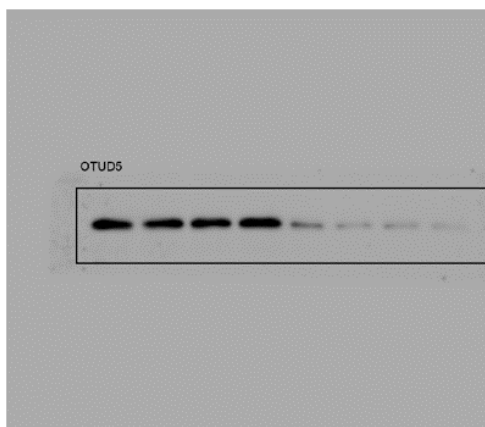

## Uncropped immunoblot gels for Supplementary Figure 5

Figure S5E-Actin  
Antibody information: Cell Signaling, 4970S, 1:1000

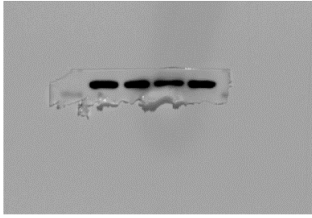

Figure S5C-GPX4  
Antibody information: Abcam, ab41787, 1:1000

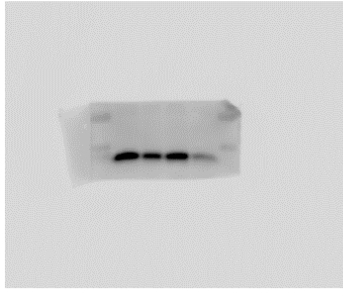

Figure S5C-OTUD5  
Antibody information: Cell signaling, 20087S, 1:1000

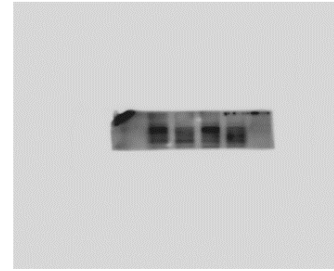

Figure S5C- Actin  
Antibody information: Cell Signaling, 4970S, 1:1000

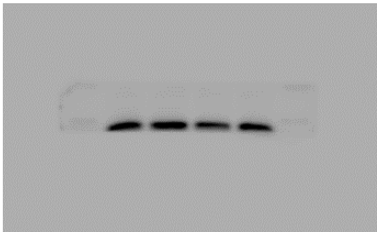

Figure S5D-VPS4AB  
Antibody information: Santa Cruz Biotechnology, sc-133122, 1:500

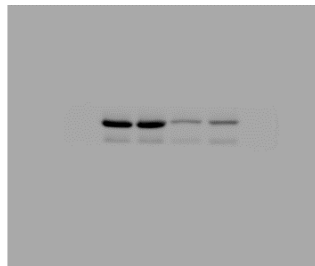

Figure S5D-GPX4  
Antibody information: Abcam, ab41787, 1:1000

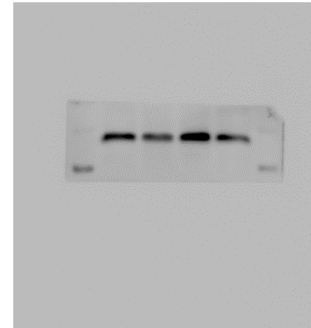

Figure S5D-OTUD5  
Antibody information: Cell signaling, 20087S, 1:1000

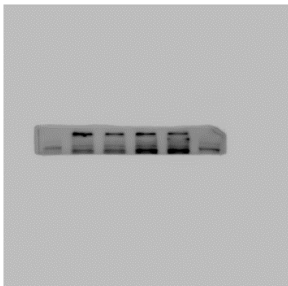

Figure S5D-Actin  
Antibody information: Cell Signaling, 4970S, 1:1000

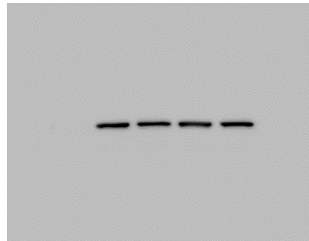

Figure S5E-GPX4  
Antibody information: Abcam, ab41787, 1:1000

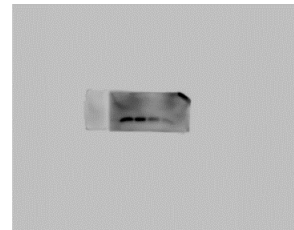

Figure S5E-OTUD5  
Antibody information: Cell signaling, 20087S, 1:1000

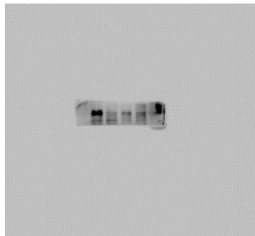

Figure S5C-HSC70  
Antibody information: Santa Cruz Biotechnology, Sc-7298, 1:500

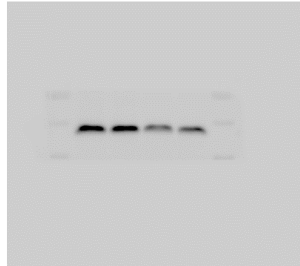

Figure S5F-UBR5

Antibody information: Cell signaling, 65344S, 1:500

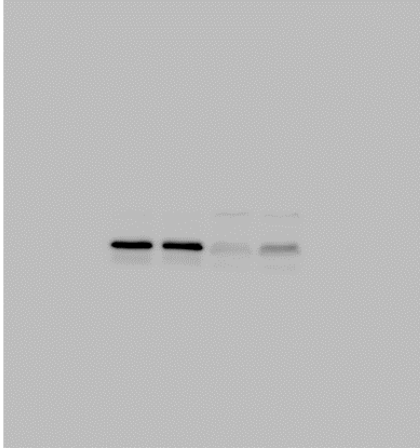

Figure S5F-GPX4

Antibody information: Abcam, ab41787, 1:1000

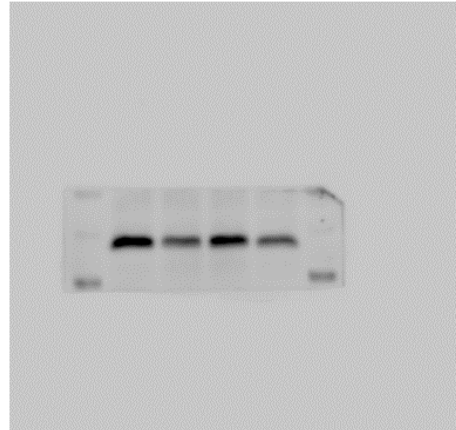

Figure S5F-OTUD5

Antibody information: Cell signaling, 20087S, 1:1000

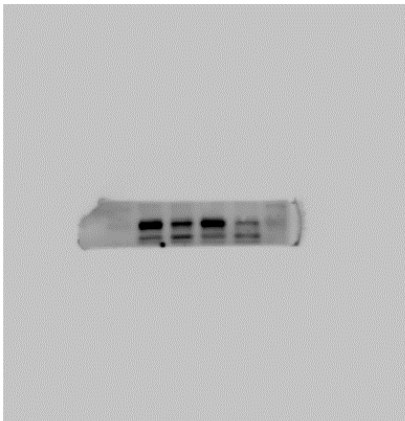

Figure S5F-Actin

Antibody information: Cell Signaling, 4970S, 1:1000

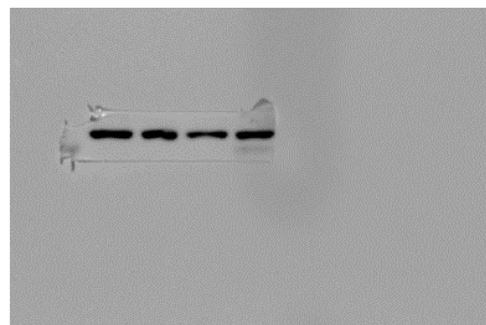

## Uncropped immunoblot gels for Supplementary Figure 6

Figure S6A-mTOR

Antibody information: Cell signaling, 2983S, 1:1000

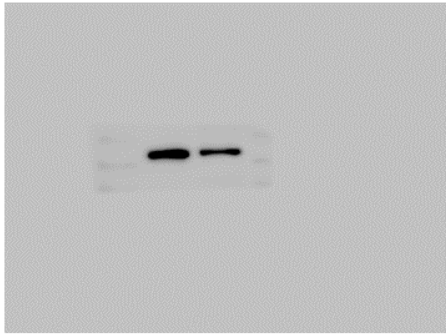

Figure S6A-mTOR-Ser2448

Antibody information: Cell signaling, 5536S, 1:500

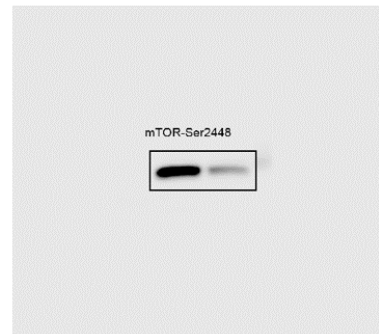

Figure S6A-mTOR-Ser2481

Antibody information: Cell signaling, 2974S, 1:500

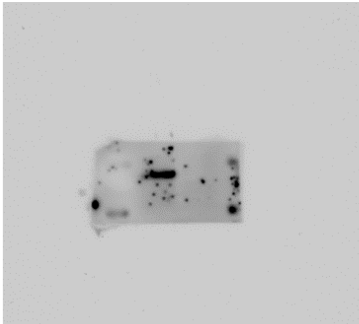

Figure S6A-S6K

Antibody information: Cell signaling, 9202S, 1:1000

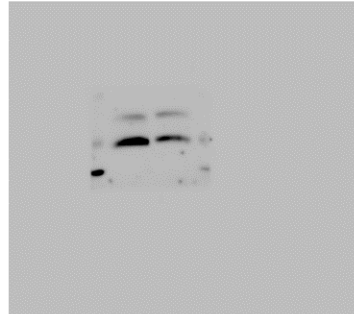

Figure S6A-S6K- Ser371

Antibody information: Cell signaling, 9208S, 1:500

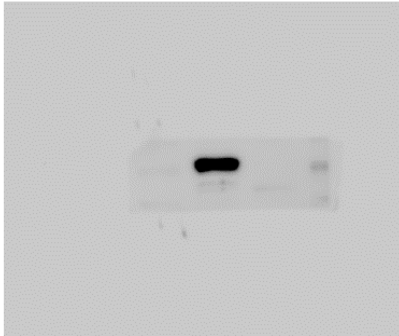

Figure S6A- Actin

Antibody information: Cell Signaling, 4970S, 1:1000

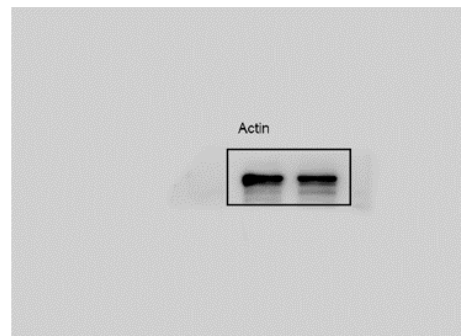

## Uncropped immunoblot gels for Supplementary Figure 7

Figure S7A-Flag

Antibody information: Cell Signaling, 14793S, 1:1000

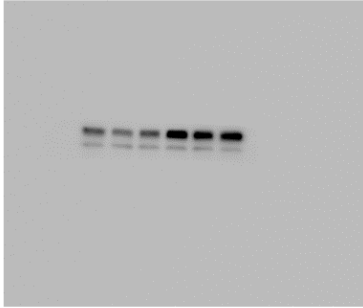

Figure S7A-GPX4

Antibody information: Abcam, ab125066, 1:1000

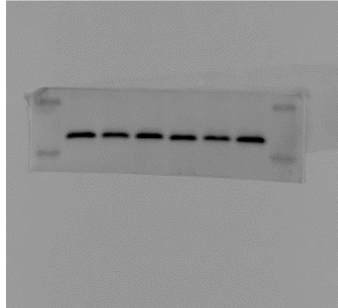

Figure S7A-Actin

Antibody information: Cell Signaling, 4970S, 1:1000

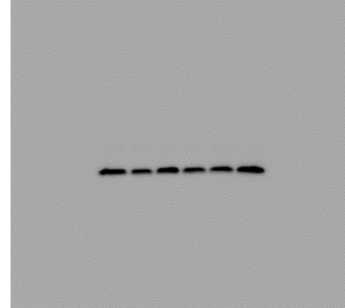

Figure S7c-Flag

Antibody information: Cell Signaling, 14793S, 1:1000

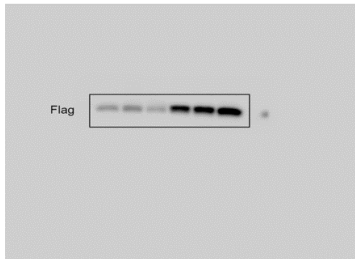

Figure S7c -GPX4

Antibody information: Abcam, ab125066, 1:1000

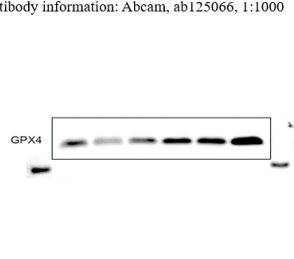

Figure S7c-S6K

Antibody information: Cell signaling, 9202S, 1:1000

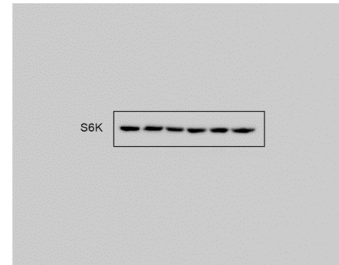

Figure S7c-p-S6K

Antibody information: Cell signaling, 9208S, 1:500

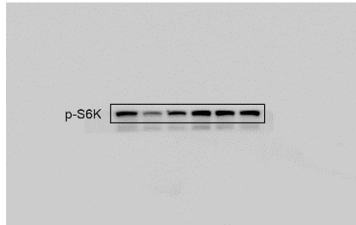

Figure S7c-4-HNE

Antibody information: Abcam, ab48506, 1:500

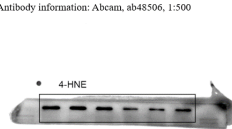

Figure S7c-LC3

Antibody information: Cell Signaling, 4108S, 1:1000

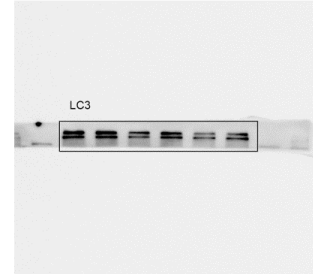

Figure S7c-ACTIN

Antibody information: Cell Signaling, 4970S, 1:1000

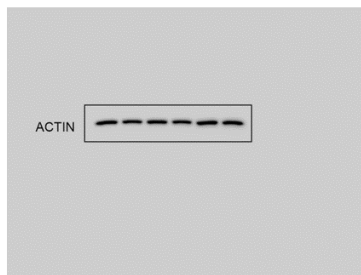

Figure S7c-IP-GPX4

Antibody information: Santa Cruz Biotechnology,  
Sc-166437, 2 µg per 500 µg protein]

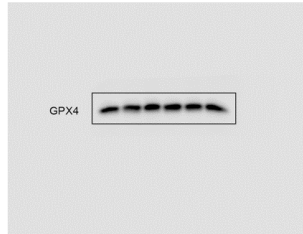

Figure S7c-IP-Ubi

Antibody information: Cell Signaling, 20326S, 1:1000

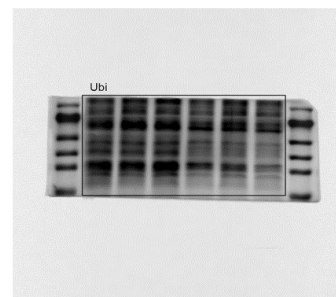

Supplement: 41467_2023_44228_MOESM1_ESM.pdf [file 41467_2023_44228_MOESM1_ESM.pdf]
